# Supplementary material for: Evaluation of Steaming and Drying of Black Sesame Seeds for Nine Cycles Using Grey-Correlation Analysis Based on Variation-Coefficient Weight
Source: MDPI journal article supplement (doi:10.3390/molecules28135266), 2023-07-07
Supplement: s1 [file s1]

**Table S1.** Sensory scoring criteria

| <b>Factors</b>             | <b>Grading criteria</b>                                                                                                              | <b>Sensory score/point</b> |
|----------------------------|--------------------------------------------------------------------------------------------------------------------------------------|----------------------------|
| Morphology<br>(100 points) | Smooth surface, no obvious cracks, and no visible impurities in normal vision;                                                       | 81-100                     |
|                            | The surface is not very round, slightly rough, with inconspicuous graininess and cracks; and no visible impurities in normal vision; | 61-80                      |
|                            | Rough surface, with obvious graininess and cracks and visible impurities with normal vision.                                         | Under 60                   |
| Color<br>(100 points)      | Uniform color, black, and shiny;                                                                                                     | 81-100                     |
|                            | Color is more even, black, and lustre feeling is weaker;                                                                             | 61-80                      |
|                            | Uneven color, black is not pure, and no luster.                                                                                      | Under 60                   |
| Texture<br>(100 points)    | Round solid, tight and not loose, and suitable bonding;                                                                              | 81-100                     |
|                            | Round solid, compact, and low adhesion;                                                                                              | 61-80                      |
|                            | Poor molding, loose, and coarse powder.                                                                                              | Under 60                   |
| Flavor<br>(100 points)     | Sesame flavor, pure, and no smell;                                                                                                   | 81-100                     |
|                            | Light sesame flavor, no smell, and taste sour or sweet;                                                                              | 61-80                      |
|                            | No sesame flavor, odor, and too sour or too sweet.                                                                                   | Under 60                   |
